# Supplementary material for: Bacterial Lipopolysaccharide Induces PD-L1 Expression and an Invasive Phenotype of Oral Squamous Cell Carcinoma Cells
Source: MDPI journal article supplement (doi:10.3390/cancers16020343), 2024-01-13
Supplement: s1 [file s1]

Table1

| Name                                | Company                   | Cat no.       |
|-------------------------------------|---------------------------|---------------|
| Actin(c4) mouse mAb                 | SANTACRUZ                 | sc-47778      |
| TLR4 Polyclonal antibody rabbit mAb | proteintech               | 19811-1-AP    |
| E-cadherin(24E10) rabbit mAb        | Cell signaling Technology | 3195          |
| N-cadherin(13A9) rabbit mAb         | SANTACRUZ                 | sc-7939       |
| PD-L1(28-8) rabbit mAb              | Abcam                     | ab213524      |
| LAMB3(OTI2D11) mouse mAb            | OriGene                   | TA804403      |
| TSG101(EPR7130) rabbit mAb          | Abcam                     | ab125011      |
| CD63(190523-001) goat mAb           | System Bioscience         | EXOAB-CD63A-1 |

Table2

|        | Forward                | Reverse                   | bp  |
|--------|------------------------|---------------------------|-----|
| MMP-2  | GGCTCATGCCTTCGCCCCAG   | ACTCCCCATCGGCGTTCCCA      | 122 |
| MMP-9  | TGACAGCGACAAGAAGTG     | CAGTGAAGCGGTACATAGG       | 143 |
| Zeb1   | TCCATGCTTAAGAGCGCTAGCT | ACCGTAGTTGAGTAGGTGTATGCCA | 78  |
| Zeb2   | CAAGAGGCGCAAACAAGCC    | GGTTGGCAATACCGTCATCC      | 128 |
| Snail1 | GGCGCACCTGCTCGGGGAGTG  | GCCGATTCGCGCAGCA          | 199 |
| Snail2 | GGGGAGAAGCCTTTTTCTTG   | TCCTCATGTTTGTGCAGGAG      | 158 |
| GAPDH  | ACCATCTTCCAGGAGCGAGA   | ACCACCTGGTGCTCAGTGTA      | 623 |
